# Supplementary material
Source: PubMed Central journal article supplement (PMC6187628)
Supplement: supp_RA118.004861_139405_1_supp_185783_pdj1xy.pdf [file supp_RA118.004861_139405_1_supp_185783_pdj1xy.pdf]

**Supplemental Table 1: Vertebrate genome characteristics**

| <b>Species<br/>(formal name)</b>                 | <b>Genome<br/>length (Gb)</b> | <b>*Genome assembly</b>                                                      | <b>*Gene annotation methods</b>                                                     |
|--------------------------------------------------|-------------------------------|------------------------------------------------------------------------------|-------------------------------------------------------------------------------------|
| Amazon molly<br>( <i>Poecilia formosa</i> )      | 1.00                          | Contigs and scaffolds                                                        | RNA-seq data, orthologous vertebrate protein sequences                              |
| Anole lizard<br>( <i>Anolis carolinensis</i> )   | 1.78                          | Contigs and scaffolds                                                        | RNA-seq data, cDNAs, ESTs, alignments of chicken protein sequences                  |
| Cave fish<br>( <i>Astyanax mexicanus</i> )       | 1.00                          | Contigs and scaffolds                                                        | RNA-seq data, orthologous vertebrate protein sequences                              |
| Chicken<br>( <i>Gallus gallus</i> )              | 1.13                          | Contigs and scaffolds                                                        | RNA-seq data, cDNAs, long read RNAs                                                 |
| Cod<br>( <i>Gadus morhua</i> )                   | 0.90                          | Whole genome shotgun and paired-end sequencing (25X coverage)                | Whole genome alignment to stickleback, orthologous vertebrate protein sequences     |
| Coelacanth<br>( <i>Latimeria chalumnae</i> )     | 2.90                          | Whole genome shotgun sequencing                                              | RNA-seq data, cDNAs, coelacanth protein sequences                                   |
| Duck<br>( <i>Anas platyrhynchos</i> )            | 1.14                          | Contigs and scaffolds                                                        | Orthologous vertebrate genes and protein sequences                                  |
| Flycatcher<br>( <i>Ficedula albicollis</i> )     | 1.12                          | Contigs and scaffolds                                                        | RNA-seq data, orthologous vertebrate protein sequences                              |
| Frog<br>( <i>Xenopus tropicalis</i> )            | 1.36                          | Contigs and scaffolds, plus whole genome shotgun sequencing (7.65X coverage) | cDNAs, orthologous vertebrate protein sequences                                     |
| Fugu<br>( <i>Takifugu rubripes</i> )             | 0.39                          | Contigs and scaffolds                                                        | Fugu proteins, orthologous vertebrate proteins, non-vertebrate protein sequences    |
| Lamprey<br>( <i>Petromyzon marinus</i> )         | 1.92                          | Whole genome shotgun (5X coverage), BAC-end sequence reads                   | Lamprey cDNA and protein sequences, orthologous vertebrate protein sequences        |
| Medaka<br>( <i>Oryzias latipes</i> )             | 0.70                          | Whole genome shotgun sequencing                                              | cDNAs, ESTs, orthologous vertebrate protein sequences                               |
| Platyfish<br>( <i>Xiphophorus maculatus</i> )    | 0.65                          | Whole genome shotgun sequencing (19.6X coverage)                             | RNA-seq data, platyfish protein sequences, orthologous vertebrate protein sequences |
| Spotted gar<br>( <i>Lepisosteus oculatus</i> )   | 0.95                          | Whole genome shotgun sequencing                                              | RNA-seq data, orthologous vertebrate protein sequences                              |
| Stickleback<br>( <i>Gasterosteus aculeatus</i> ) | 0.46                          | Whole genome shotgun sequencing (11X coverage)                               | cDNAs, ESTs, orthologous vertebrate protein sequences                               |
| Tetraodon                                        | 0.34                          | Contigs and scaffolds, whole genome                                          | #Orthologous vertebrate protein sequences                                           |

|                                            |      |                                                                   |                                                                      |
|--------------------------------------------|------|-------------------------------------------------------------------|----------------------------------------------------------------------|
| ( <i>Tetraodon nigroviridis</i> )          |      | shotgun sequencing (6X coverage)                                  |                                                                      |
| Tilapia ( <i>Oreochromis niloticus</i> )   | 0.97 | Whole genome shotgun sequencing                                   | RNA-seq data, orthologous vertebrate protein sequences               |
| Turkey ( <i>Meleagris gallopavo</i> )      | 1.04 | Whole genome shotgun sequencing (30X coverage)                    | cDNAs, ESTs, chicken cDNAs, orthologous vertebrate protein sequences |
| Turtle ( <i>Pelodiscus sinensis</i> )      | 2.10 | Contigs and scaffolds                                             | RNA-seq data, orthologous vertebrate protein sequences               |
| Zebra finch ( <i>Taeniopygia guttata</i> ) | 1.20 | Whole genome shotgun sequencing (6X coverage), plus 35 BAC clones | ESTs, avian protein sequences                                        |
| Zebrafish ( <i>Danio rerio</i> )           | 1.37 | Contigs and scaffolds; BAC and fosmid clones                      | RNA-seq data, cDNAs, zebrafish protein sequences                     |

\*Contigs and scaffolds – overlapping large DNA fragments; BAC – bacterial artificial chromosome (contains foreign DNA); EST – expressed sequence tag; RNA-seq – RNA-based DNA sequencing

#Information on assembly is incomplete.
