# Supplementary material
Source: PubMed Central journal article supplement (PMC6187628)
Supplement: supp_RA118.004861_139405_1_supp_185784_pdj1xy.pdf [file supp_RA118.004861_139405_1_supp_185784_pdj1xy.pdf]

## SUPPLEMENTAL FIGURE LEGEND

**Supplemental Figure 1. Characterization of chicken *Igf2* exon 2.** **Top.** Map of the part of chicken *Igf2*, illustrating exon 2 (box) and adjacent introns (thin lines). The gene sequence of the end of the 5' intron (lower case letters) and the start of the exon (upper case) are listed below the map. **Bottom.** Diagram of chicken *Igf2* cDNA XM\_015286525. The box represents the coding regions and the thin line, 5' and 3' UTRs. The 3' UTR is longer than shown on the map, as indicated by the angled parallel lines. The cDNA sequence corresponding to the 3' end of exon 1 and the 5' end of exon 2 are listed above the map, and are aligned with the gene sequence of exon 2. For both gene and cDNA, the locations of ATG codons are indicated. A scale bar is shown.
